# Supplementary material
Source: publisher site journal article supplement (https://www.dovepress.com/article/339907)
Supplement: Supplementary file 1 [file get_supplementary_file.php]

| **Supplementary Table 1.** **NRI and IDI of the nomogram for predicting 1-, 3-, 5-year of PINHL patients in the training, internal validation, and external validation cohorts.** | | | |
| --- | --- | --- | --- |
|  | **Training cohort** | **Internal validation cohort** | **External validation cohort** |
| **NRI** |  |  |  |
| one year | 0.73 | 0.684 | 1.435 |
| three year | 0.74 | 0.721 | 1.251 |
| five year | 0.791 | 0.74 | 0.568 |
| **IDI (one year)** | 0.126 | 0.136 | 0.136 |
| z | 14.588 | 10.917 | 2.725 |
| **IDI (three year)** | 0.151 | 0.162 | 0.204 |
| z | 15.687 | 11.461 | 2.921 |
| **IDI (five year)** | 0.162 | 0.172 | 0.226 |
| z | 16.192 | 11.707 | 2.974 |

**Abbreviations:** NRI, Net reclassification index; IDI, Integrated Discrimination Improvement.
